# Supplementary material
Source: PubMed Central journal article supplement (PMC4880492)
Supplement: NIHMS781452-supplement-3.pdf [file NIHMS781452-supplement-3.pdf]

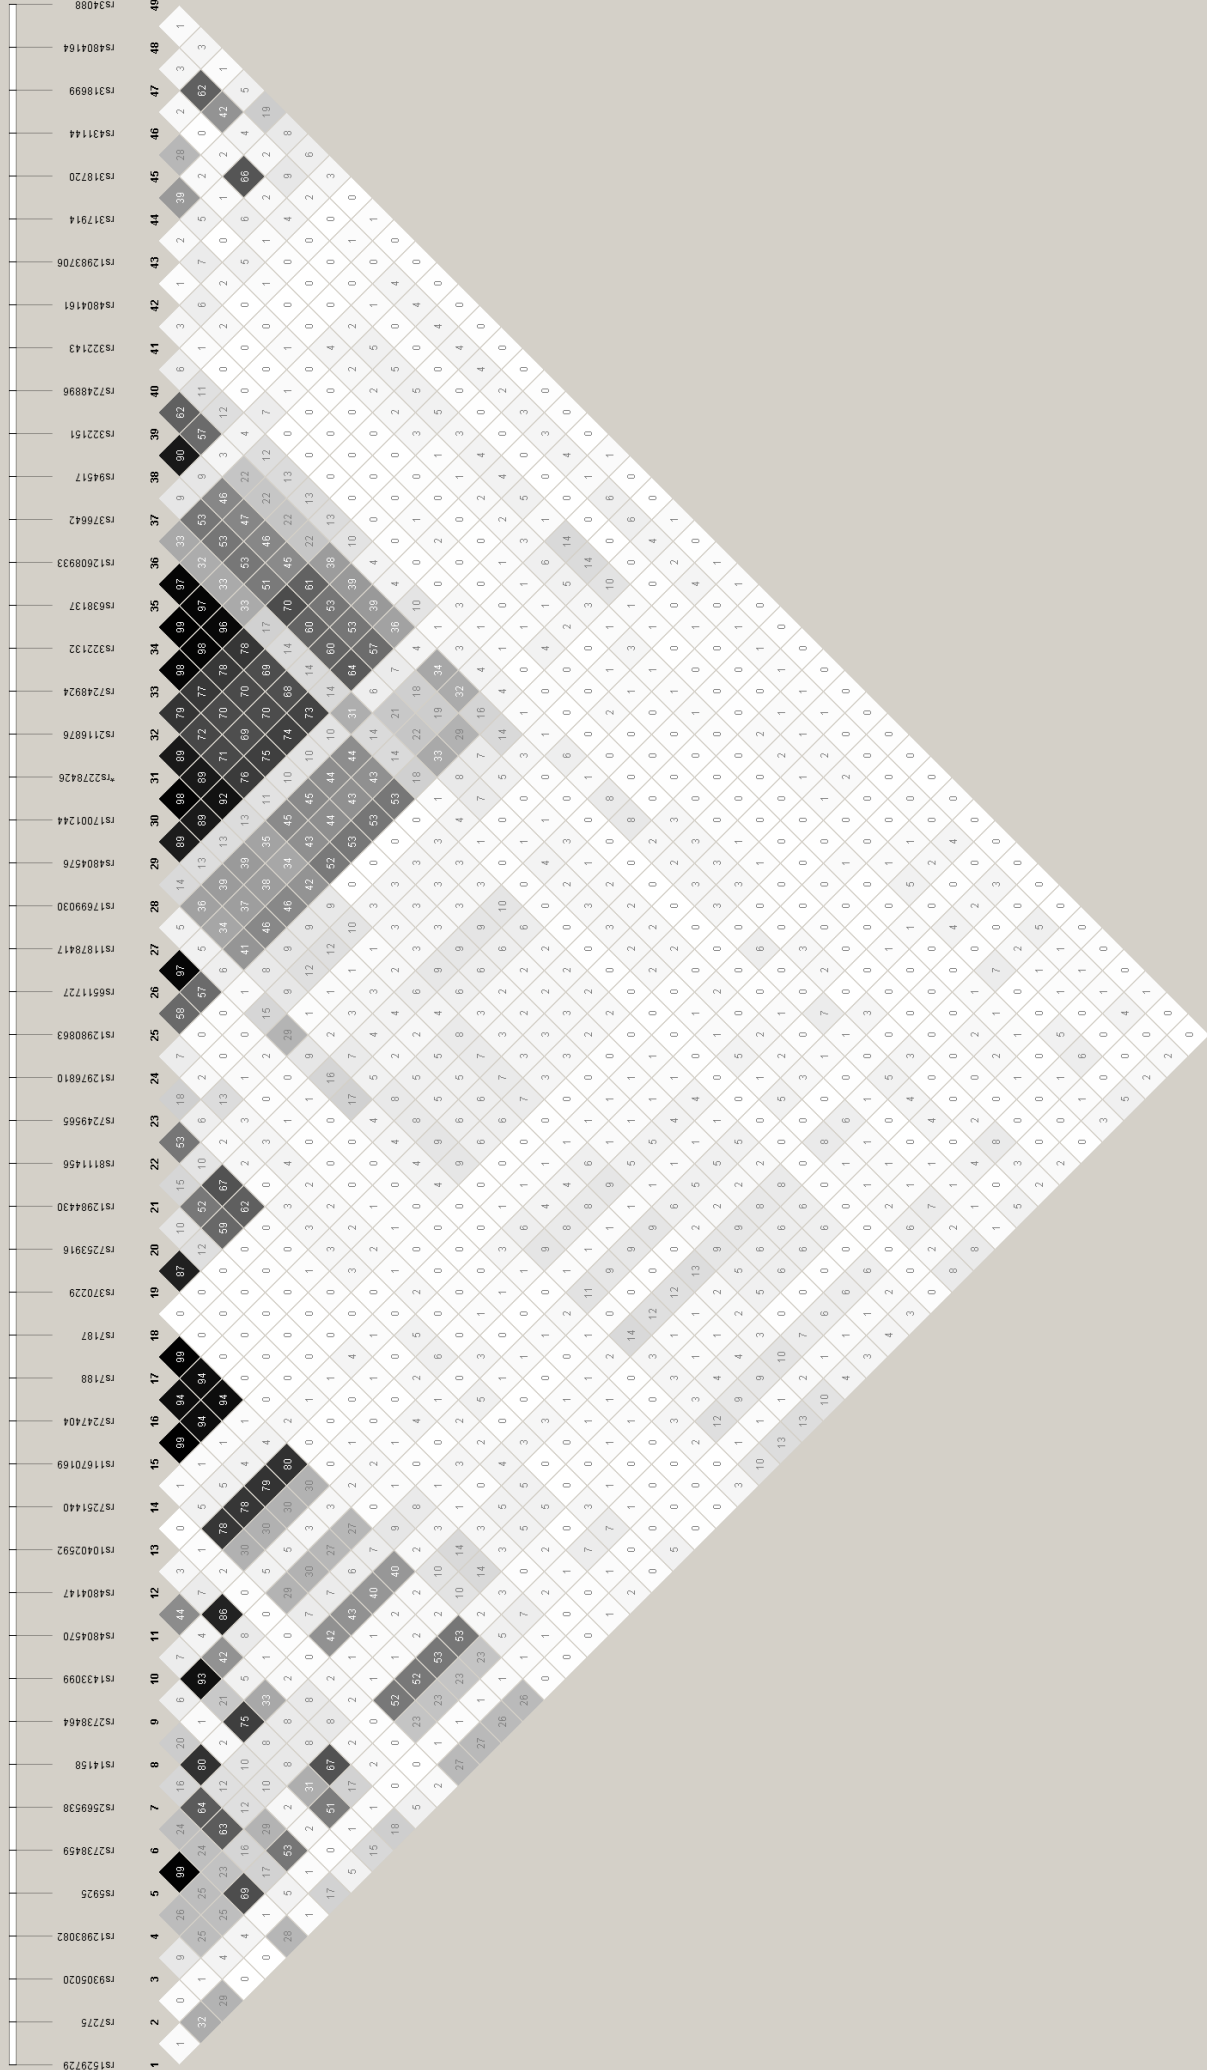

rs1529279  
rs7275  
rs905030  
rs12983082  
rs5925  
rs2738459  
rs2569538  
rs14158  
rs2738464  
rs1433099  
rs4804570  
rs480447  
rs10402592  
rs7251440  
rs11670169  
rs2747404  
rs7188  
rs7187  
rs370229  
rs2753916  
rs12984430  
rs811456  
rs7249565  
rs12976810  
rs12980893  
rs6511727  
rs11878417  
rs17699030  
rs4804576  
rs17001244  
rs2278426  
rs216876  
rs7248924  
rs22132  
rs638137  
rs1298933  
rs376842  
rs94517  
rs22151  
rs7248896  
rs32143  
rs4804161  
rs12983706  
rs317914  
rs318720  
rs431144  
rs318699  
rs4804164  
rs4088
